# Supplementary material
Source: bioRxiv or medRxiv preprint supplement (https://medrxiv.org/highwire/filestream/95373/field_highwire_adjunct_files/2/2020.09.01.20186304-3.pdf)
Supplement: Supplementary file [file 2020.09.01.20186304-3.pdf]

## Supplemental File C: Inferential Statistical Analyses

|                                       | Satisfaction with Organizational Responses<br>(/25) |             |         | State-Trait Anxiety Inventory (/24) |             |         | Impact of COVID-19 on Wellness |             |         |
|---------------------------------------|-----------------------------------------------------|-------------|---------|-------------------------------------|-------------|---------|--------------------------------|-------------|---------|
|                                       | Mean (SD)                                           | 95% CI      | p-value | Mean (SD)                           | 95% CI      | p-value | Mean (SD)                      | 95% CI      | p-value |
|                                       | $\alpha = .806$                                     |             |         | $\alpha = .849$                     |             |         | $\alpha = .744$                |             |         |
| <i>Level of Training<sup>a</sup></i>  |                                                     |             |         |                                     |             |         |                                |             |         |
| Medical Student                       | 16.95 (4.32)                                        | 16.82-17.08 | .000    | 14.36 (4.12)                        | 14.23-14.48 | .000    | 17.31 (4.07)                   | 17.19-17.43 | .000    |
| Resident                              | 15.67 (4.32)                                        | 15.36-15.98 |         | 15.13 (4.06)                        | 14.83-15.42 |         | 18.52 (3.86)                   | 18.24-18.80 |         |
| <i>Geographic Regions<sup>b</sup></i> |                                                     |             |         |                                     |             |         |                                |             |         |
| East Asia and Pacific                 | 18.46 (4.28)                                        | 18.01-18.91 | .000    | 13.33 (3.77)                        | 12.93-13.73 | .000    | 16.77 (4.22)                   | 16.33-17.22 | .000    |
| Europe and Central Asia               | 17.34 (4.25)                                        | 17.16-17.52 |         | 14.33 (4.18)                        | 14.15-14.51 |         | 17.14 (4.09)                   | 16.96-17.31 |         |
| Latin American and Caribbean          | 14.78 (4.19)                                        | 14.48-15.07 |         | 15.22 (4.12)                        | 14.93-15.51 |         | 18.15 (4.10)                   | 17.86-18.44 |         |
| Middle East and North Africa          | 16.04 (5.10)                                        | 15.13-16.96 |         | 14.36 (3.81)                        | 13.66-15.05 |         | 17.14 (3.97)                   | 16.42-17.86 |         |
| North America                         | 17.14 (3.78)                                        | 16.94-17.34 |         | 13.45 (4.01)                        | 14.24-14.66 |         | 17.92 (3.78)                   | 17.72-18.11 |         |
| South Asia                            | 15.39 (5.19)                                        | 14.37-16.41 |         | 15.01 (4.51)                        | 14.09-15.93 |         | 17.45 (4.62)                   | 16.54-18.37 |         |
| Sub-Saharan Africa                    | 12.93 (4.28)                                        | 12.20-13.66 |         | 15.12 (4.23)                        | 14.44-15.80 |         | 16.94 (4.42)                   | 16.24-17.65 |         |

$\alpha$  = Cronbach's alpha (reliability statistic); upon exploratory factor analysis, all items in each scale loaded to one factor, suggesting each scale is unidimensional (construct validity)

<sup>a</sup> = Independent samples t-test, equal variances not assumed based on Levene's test for equality of variances; statistical significance if  $p < .05$

<sup>b</sup> = Analysis of Variance with Bonferroni correction to adjust for post-hoc corrections statistical significance if  $p < 0.007$ ;
